21 **Abstract**

22 **Aims:** Programmed cell death-1 (PD-1) blockade therapy frequently results in immune-  
23 related adverse events involving the thyroid gland (thyroid irAEs). Although clinical  
24 features of thyroid irAEs are known, the mechanisms remain unclear. Here, we conducted  
25 a pilot study to investigate mechanisms of thyroid irAE development from the perspective  
26 of autoantibodies.

27 **Methods:** We performed immunoprecipitation-based assays using sera of 3 patients who  
28 developed thyroid irAEs with PD-1 blockade therapy by nivolumab and HEK293T cell  
29 lysates, including overexpressed proteins of interest (NKX2-1, PAX8, FOXE1, and  
30 HHEX; thyroid-specific transcriptional factors). The pellets were analyzed by western  
31 blot to detect the HiBit tag attached to the C-terminus of the proteins.

32 **Results:** Relevant changes to NKX2-1 bands were not seen in all 3 patients, but PAX8  
33 bands were augmented in patient 2 with lung cancer and patient 3 with renal cell  
34 carcinoma. In addition, FOXE1 bands were augmented in patient 1 with malignant  
35 melanoma and patient 3, and a HHEX band was augmented in patient 3. Thus, we  
36 revealed novel thyroid-specific autoantibodies, PAX8Ab, FOXE1Ab, and HHEXAb.  
37 Expression patterns of the antigens recognized by these antibodies were not identical to  
38 the primary sites, so autoimmune responses in thyroid irAE may originate from the  
39 thyroid gland, and not the malignancy. Considering that TPOAb rather than TgAb is often  
40 negative in patients with thyroid irAEs, other mechanisms such as cytotoxic T cell and  
41 antigenicity of thyroglobulin may be involved.

42 **Conclusions:** Although the significance of these novel autoantibodies needs further  
43 examination, the present study provides new insights for thyroid autoimmunity.

44

45 **Key words:**

46 PD-1, Autoantibody, Transcriptional factor, Immune-related adverse events, Thyroid

47 dysfunction

## 48 **Introduction**

49 Immune-related adverse events (irAEs) frequently develop in patients  
50 administered immune checkpoint inhibitors. The inhibitors used in clinical practice  
51 consist of monoclonal antibodies against cytotoxic T-lymphocyte-associated protein 4  
52 (CTLA-4), programmed cell death-1 (PD-1), and programmed death-ligand 1 (PD-L1).  
53 Several endocrine-related organs are involved with irAEs: hypophysitis with CTLA-4  
54 blockade therapy, ACTH deficiency, type 1 diabetes, and thyroid dysfunction with PD-1  
55 blockade therapy (1).

56 Thyroid irAEs, which are irAEs involving the thyroid gland, are commonly  
57 caused by monoclonal antibodies against PD-1 such as nivolumab and pembrolizumab.  
58 Our previous case-series study and following retrospective cohort study presented a  
59 distinct clinical course of thyroid irAEs: a transient and rapid course of thyrotoxicosis and  
60 subsequent persistent hypothyroidism (2,3). High incidence of thyroid irAEs in PD-1  
61 blockade therapy is another important matter: 13.5% in overt thyroid irAEs with  
62 nivolumab (3), 14.0–20.8% in thyroid irAEs with pembrolizumab (4-6).

63 Clinical features of thyroid irAEs are substantially clarified, but mechanisms of  
64 thyroid irAE development by PD-1 blockade therapy remain unclear to a large extent.  
65 Associations between thyroid diseases and the PD-1/PD-L1 pathway have been reported:  
66 both differentiated and anaplastic thyroid cancers express PD-L1, a ligand of the PD-1  
67 receptor (7,8), and a single nucleotide polymorphism (SNP) in the *CD274* gene coding  
68 PD-L1 and SNPs in the *PDCDI* gene coding PD-1 associated with Graves' disease has  
69 been identified (9,10). There are no reports regarding associations between SNPs of PD-  
70 1/PD-L1 pathway and thyroiditis, a cause of thyroid dysfunction by irAEs (11). We  
71 examined and reported that both ligands of PD-1, PD-L1 and PD-L2, are expressed even

72 in normal thyroid tissue (2), which supports the idea that PD-1 blockade therapy could  
73 reduce immune tolerance in the thyroid gland.

74 To investigate further mechanisms of thyroid irAEs, we focused on relationships  
75 between thyroid irAEs and prognosis (3,5,12). We previously provided evidence that  
76 thyroid irAEs are associated with good prognosis in lung cancer but not in malignant  
77 melanoma (3). Here, we wondered antibodies produced by the immune response and their  
78 antigens might be intermediators of this prognostic effects. Interestingly, irAEs are likely  
79 to develop in the same organs as the primary sites: pneumonitis is common in lung cancer,  
80 while skin irAEs are common in malignant melanoma (13). Moreover, patients with  
81 pneumonitis as an irAE had longer progression-free survival in non-small cell lung cancer  
82 (14), and patients with skin-related irAEs had longer overall survival in malignant  
83 melanoma (13). In this context, we hypothesized that antigens common to primary sites  
84 and the thyroid gland are involved in the autoimmune responses in thyroid irAEs. In other  
85 words, if thyroid irAEs are caused by actions associated with antibodies recognizing  
86 antigens common to the primary sites and the thyroid gland, autoimmune responses to  
87 cancers could additionally be expected.

88 Here, to provide mechanistic insights into thyroid irAEs, we conducted a pilot  
89 study from the perspective of autoantibodies. The procedure was based on the following  
90 findings. Firstly, antibodies related to thyroid irAEs might be different from those of other  
91 types of thyroiditis, such as anti-thyroperoxidase antibodies (TPOAbs) and anti-  
92 thyroglobulin antibodies (TgAbs), as some patients with thyroid irAEs were double  
93 negative for them (3,15,16). Secondly, endocrine-related irAEs including ACTH  
94 deficiency and type 1 diabetes as well as thyroid irAEs are commonly associated with  
95 severe or null hormonal deficiency. Anti-PIT-1 syndrome suggested us testing

96 transcriptional factors because it presents with severe hormonal deficiency and associates  
97 with antibodies for the transcriptional factor specific for cells secreting the hormones (17).  
98 In the case of thyroid irAEs, it seemed to be worth examining well-known transcription  
99 factors essential for the thyroid gland: NK2 homeobox 1 (NKX2-1), paired box 8 (PAX8),  
100 forkhead box E1 (FOXE1), and hematopoietically-expressed homeobox (HHEX) (18). If  
101 novel autoantibodies for these thyroid-specific transcriptional factors are detected, the  
102 present study provides new insights for exploring the field of thyroid autoimmunity.

103

## 104 **Materials and Methods**

### 105 *Plasmid construction*

106 We constructed pcDNA3.1 (Thermo Fisher Scientific, Waltham, MA) based  
107 plasmid vectors with coding sequences for *NKX2-1* (NM\_003317), *PAX8* (NM\_003466),  
108 *FOXE1* (NM\_004473), and *HHEX* (NM\_002729) attached to a FLAG tag at the 5' end  
109 and HiBit tag (Promega, Madison, WI) at the 3' end, using a PCR technique. These coding  
110 sequences were derived from the cDNA of human normal thyroid tissue obtained from  
111 thyroidectomy specimens for thyroid cancer, as previously described (2). These  
112 constructed vectors (pcDNA3.1-FLAG-NKX2-1-HiBit, pcDNA3.1-FLAG-PAX8-HiBit,  
113 pcDNA3.1-FLAG-FOXE1-HiBit, and pcDNA3.1-FLAG-HHEX-HiBit) were verified by  
114 sequencing.

### 115 *Cell culture and protein extraction*

116 HEK293T, a derivative of human embryonic kidney 293 cells, was maintained  
117 in Dulbecco's modified Eagle's medium (DMEM) (Thermo Fisher Scientific) with  
118 Antibiotic Antimycotic (Thermo Fisher Scientific) and 10% fetal bovine serum (Sigma-  
119 Aldrich, St. Louis, MO) as previously described (19).

120           Transient transfections were performed in 100-mm dishes. HEK293T cells were  
121   seeded at  $1.0 \times 10^6$  cells/dish in 10 mL of antibiotic-free DMEM supplemented with 10%  
122   fetal bovine serum. After incubation for 24 h, transient transfections of 5  $\mu$ g of  
123   pcDNA3.1-based vectors were performed using 25  $\mu$ g of PEI MAX (Polysciences,  
124   Warrington, PA). After an additional incubation for 24 h, whole cell lysates in  
125   radioimmunoprecipitation assay buffer (Nacalai Tesque, Kyoto, Japan) were obtained.  
126   We evaluated the protein concentration by the Bradford method with Protein Assay CBB  
127   Solution (Nacalai Tesque) using bovine serum albumin as a standard.

#### 128   *Immunoprecipitation and western blot*

129           We mixed 500  $\mu$ g of extracted cell lysates and 100  $\mu$ L of patients' sera with 100  
130    $\mu$ L of SureBeads™ Protein G Magnetic Beads (Bio-Rad, Hercules, CA) and added  
131   phosphate-buffered saline containing 0.2% of Tween 20 (PBS-T) (Sigma-Aldrich) up to  
132   a total of 1000  $\mu$ L. After rotation for 24 h at room temperature, beads were washed in  
133   PBS-T, and bound proteins were eluted with 20  $\mu$ L of 20 mM Glycine (pH 2.0) (Nacalai  
134   Tesque) and neutralized with 2  $\mu$ L of 0.1 M phosphate buffer (pH 7.4) (Nacalai Tesque).

135           The total amount of the pellets and 2.5  $\mu$ g of input proteins were electrophoresed  
136   in Bolt 4–12% Bis-Tris Plus Gels (Thermo Fisher Scientific), and transferred onto  
137   polyvinylidene difluoride membranes with iBlot Dry Blotting System (Thermo Fisher  
138   Scientific), according to the manufacturer's instructions.

139           For detecting HiBit-tag, we used the Nano Glo HiBit Blotting System  
140   (Promega). After overnight incubation in LgBit protein solution at 4 °C, bands were  
141   detected by adding substrate solution in ImageQuant LAS 4000 (GE Healthcare, Chicago,  
142   IL). For detecting other tags and proteins, the membranes were blocked with Blocking  
143   One (Nacalai Tesque). We incubated with primary antibodies overnight at 4 °C, and then

144 with secondary antibodies for 2 h at room temperature. Bands were detected by a  
145 chemiluminescent method with Chemi Lumi One Super (Nacalai Tesque) in ImageQuant  
146 LAS 4000. The primary antibodies used were the mouse monoclonal anti FLAG M2  
147 antibody (F3165; Sigma Aldrich) and rabbit polyclonal antibody against  $\beta$ -actin antibody  
148 (4967; Cell Signaling Technology, Danvers, MA) as an endogenous control. The  
149 secondary antibody used was horseradish-peroxidase (HRP)-conjugated goat polyclonal  
150 antibody against mouse IgG1 (1070-05; Southern Biotech, Cambridge, United Kingdom),  
151 HRP-conjugated goat polyclonal antibody against rabbit IgG (4050-05; Southern  
152 Biotech), and HRP-conjugated goat polyclonal antibody against human Ig (2010-05;  
153 Southern Biotech).

154

## 155 **Results**

### 156 *Case Presentation*

157 In the present study, we examined sera of 3 patients who developed thyroid  
158 irAEs. Their detailed characteristics are shown in Table 1 and their clinical courses are  
159 described below.

#### 160 *Patient 1: 82-year-old woman with malignant melanoma*

161 Four years prior to starting nivolumab therapy, she was diagnosed with primary  
162 hypothyroidism and was treated with 50  $\mu$ g of levothyroxine. Nevertheless, as she  
163 continued with 50  $\mu$ g of levothyroxine therapy, hypothyroidism with fatigue developed  
164 53 days after the first administration of nivolumab. TPOAb and TgAb were double  
165 positive at the onset of this hypothyroidism. There was no evidence of thyrotoxicosis  
166 during the entire period of nivolumab therapy. We obtained serum samples 123 days after  
167 the first administration of nivolumab, even though she was euthyroid at this time due to



168 the increase in levothyroxine dose to 100 µg/day.

169 *Patient 2: 62-year-old woman with non-small cell lung cancer*

170 She had no past history of thyroid diseases and was euthyroid before nivolumab  
171 therapy. Mild thyrotoxicosis developed 42 days after the first administration of nivolumab.  
172 Nivolumab therapy was discontinued because muscle pain and elevation of creatine  
173 kinase (1058 IU/L) were observed simultaneously. She then developed asymptomatic  
174 hypothyroidism at 124 days after the first administration of nivolumab, and received  
175 levothyroxine replacement. TPOAb was negative and TgAb was positive at the onset of  
176 hypothyroidism. We obtained serum samples 124 days after the first administration of  
177 nivolumab when she developed hypothyroidism.

178 *Patient 3: 59-year-old woman with renal cell carcinoma*

179 She had prior axitinib therapy and presented with subclinical hypothyroidism  
180 before nivolumab therapy. At 41 days after the first administration of nivolumab, she  
181 developed thyrotoxicosis that worsened and caused fatigue. TPOAb and TgAb were  
182 double positive at the onset of thyrotoxicosis. Prolonged diarrhea and elevated liver  
183 enzymes (AST 366 IU/L, ALT 329 IU/L, Grade 3) were also observed. For treatment of  
184 these irAEs, glucocorticoids were administered; 100 mg/day methylprednisolone for 4  
185 days, 50 mg/day prednisolone for 3 days, and 25 mg/day prednisolone for 3 days. Her  
186 condition, liver enzymes, and abnormalities of thyroid function improved without  
187 developing hypothyroidism. We obtained serum samples 129 days after the first  
188 administration of nivolumab, even though she was euthyroid at this time.

189 ***Identification of autoantibodies in patients' sera***

190 We initially confirmed that plasmid vector constructs successfully expressed  
191 proteins of interest (Figure 1). Detection of FLAG-tag attached to the N-terminus and

192 HiBit tag to the C-terminus showed similar results that each band corresponded to its  
193 putative molecular weight; the band of FLAG-NKX2-1-HiBit was at 45 kDa, the bands  
194 of FLAG-PAX8-HiBit bands were at 52 and 55 kDa, the FOXE1 band was at 44 kDa, and  
195 the HHEX band was at 42 kDa.

196 Subsequently, we performed immunoprecipitation using cell lysates including  
197 overexpressed proteins of interest and sera of patients (Figure 2). We prepared control  
198 pellets obtained by using serum of an individual control subject who was confirmed as  
199 euthyroid and negative for TPOAb and TgAb, defined as control A. Immunoprecipitated  
200 pellets were analyzed by western blot. There were no obvious differences in detected  
201 human immunoglobulin (Ig) among the pellets of the three patients and the control A.

202 We evaluated augmentation of bands, suggesting that antibodies were bound to  
203 the corresponding proteins. The HiBit tag was used because of its low background signals.  
204 Augmentation of the NKX2-1 bands were not seen. The lower bands of PAX8 were  
205 augmented in patients 2 and 3 (Figure 2B and Figure 2C, respectively), while the upper  
206 bands showed no changes. For FOXE1, bands at 44 kDa and additional bands at 25 kDa  
207 (detected only in pellets) were augmented in patients 1 and 3 (Figure 2A and Figure 2C,  
208 respectively). A HHEX band was augmented in patient 3 (Figure 2C). These results are  
209 summarized in Table 1.

210 Finally, to reinforce specificity of augmentation of PAX8, FOXE1, and HHEX  
211 bands in these 3 patients, we additionally tested sera of 3 subjects who was confirmed as  
212 euthyroid and negative for TPOAb and TgAb, defined as control B, C, and D. As  
213 expected, no obvious augmentation of bands compared to control A was observed in these  
214 additional controls (Figure 3).

215

216 **Discussion**

217 Here we performed a pilot study to investigate mechanisms of thyroid irAEs  
218 from the perspective of autoantibodies. Immunoprecipitation-based assays using sera  
219 from 3 patients who developed thyroid irAEs revealed novel autoantibodies for PAX8,  
220 FOXE1, and HHEX, which are thyroid-specific transcriptional factors.

221 Reliability of our experimental results was supported by the following facts.  
222 Augmentation of bands observed differently; this would be in contrast to systemic  
223 activated immunoreactivity if all four bands were augmented. In addition, we verified that  
224 the amounts of immunoglobulin (Ig) collected in IP pellets did not differ between patients  
225 and a control; if the Ig amount had been different, this would indicate non-specific  
226 immunoreactivity. Lastly, 3 additional controls did not present augmentation of bands;  
227 novel autoantibodies seemed to be uncommon at least in normal subjects.

228 There are some autoantibodies involving thyroiditis, but thyroid-specific  
229 autoantibodies are limited to TPOAb and TgAb. TPOAb and TgAb are mainly seen in  
230 chronic autoimmune thyroiditis (Hashimoto's thyroiditis). The positive rate of TPOAb  
231 and TgAb tests in chronic autoimmune thyroiditis is difficult to know because its  
232 diagnosis depends on positive results of TPOAb and/or TgAb. However, we often see  
233 patients with hypothyroidism who are double negative for TPOAb and TgAb. A previous  
234 study has shown that TPOAb and/or TgAb are positive in more than 90% of patients with  
235 chronic autoimmune thyroiditis (20). In other words, there are particular patients without  
236 TPOAb and TgAb with autoimmune thyroiditis.

237 Interestingly, patients without TPOAb and TgAb at the development of thyroid  
238 irAEs are frequently observed (3,15,16). For example, of 17 patients with thyroid irAEs  
239 in our previous study, 7 patients were double positive, 5 were double negative, and 5 were

240 exclusively positive for TgAbs, while no patients were exclusively positive for TPOAbs  
241 (3). Even at baseline, similar discrepancy that positivity of TgAb was higher than that of  
242 TPOAb was seen in patients with thyroid irAEs (21). The etiology may differ between  
243 chronic autoimmune thyroiditis and thyroid irAE by PD-1 blockade therapy.

244 The present investigation focused on thyroid-specific transcriptional factors by  
245 reasons discussed in the Introduction. Autoantibodies for transcriptional factors were  
246 reported in some papers such as PIT1-antibody in hypopituitarism (17) and TIF1- $\gamma$  in  
247 dermatomyositis (22). In addition, antibodies recognizing intracellular antigens such as  
248 Hu, Yo, and Ri are often detected in paraneoplastic syndrome (23). However,  
249 administration of these antibodies to animals did not show relevant pathogenicity (24-  
250 26). On the other hand, the involvement of cytotoxic T cells positive for CD8 was  
251 suggested in paraneoplastic syndrome related to the Hu antibody (27). CD8 T cells were  
252 increased in peripheral blood after PD-1-targeted therapy in lung cancer patients (28).  
253 The cytotoxicity of T cells might have a more dominant role than antibody-specific  
254 immunoglobulins in irAEs by PD-1 blockade therapy.

255 To discuss the significance of the novel autoantibodies, their origins are an  
256 important matter. PAX8 was not expressed in malignant melanoma, rarely in lung cancer,  
257 but often in renal cell carcinoma (29). FOXE1 was often expressed in lung cancer (30).  
258 However, our results did not correspond with these expression patterns: PAX8 antibodies  
259 were found in patient 2 with lung cancer and in patient 3 with renal cell carcinoma, and  
260 FOXE1 antibodies were found in patient 1 with malignant melanoma and patient 3 with  
261 renal cell carcinoma. It is well known that the adult thyroid gland expresses PAX8 and  
262 FOXE1 (29,31). In this context, autoimmune responses in thyroid irAEs might originate  
263 from the thyroid gland.

264 We believe that the thyroid gland is susceptible to an autoimmune response. This  
265 is supported by the high frequency of chronic autoimmune thyroiditis (32). This cause  
266 has not been completely understood, but the following information seems to be suggestive  
267 of it. Thyroglobulin in the thyroid follicle may have high antigenicity because  
268 thyroglobulin-immunized mice often develop thyroiditis even if the mice were  
269 immunized by murine thyroglobulin (33). The thyroid gland needs strong immune  
270 tolerance because the thyroid gland expresses both PD-L1 and PD-L2 (2). Moreover,  
271 TgAb rather than TPOAb could be associated with thyroid irAEs by PD-1 blockade  
272 therapy (3,21), including through the prediction of thyroid irAEs.

273 Integrating the findings so far, we consider putative mechanisms of thyroid  
274 irAEs: 1) positive TgAb may reflect preexisting autoimmune response because  
275 thyroglobulin has potential for antigenicity; 2) PD-1 blockade therapy easily causes  
276 thyroiditis by disrupting the upregulated immune tolerance in the thyroid gland; 3) this  
277 type of thyroiditis is accompanied by the production of thyroid-specific autoantibodies  
278 except for TPOAb and TgAb, but the pathogenicity does not depend on these  
279 autoantibodies; 4) in terms of a relationship between thyroid irAEs and prognosis,  
280 immune response by CD8 T cells occurs if tumors express antigens recognized by  
281 thyroid-specific autoantibodies.

282 Several unresolved issues remain after this pilot study. Testing larger number of  
283 samples including various controls such as chronic autoimmune thyroiditis occurred  
284 without immune checkpoint therapy is essential for confirming specificity of novel  
285 autoantibodies. Whether patients without TPOAbs and TgAbs at the development of  
286 thyroid irAEs have these novel antibodies is an important matter, because our tested  
287 patients had TPOAbs and/or TgAbs. As for assays, it is better to improve background

288 signals observed in the controls and low throughput. Although enzyme immunoassay  
289 might be suitable for this aim, specificity of the signals should be validated by western  
290 blot analysis while referring to the present study. Similar examinations for other thyroid-  
291 specific proteins may also contribute to clarify mechanisms of thyroid irAE.

292 In this pilot study, we identified novel thyroid-specific autoantibodies, PAX8Ab,  
293 FOXE1Ab, and HHEXAb in some patients with thyroid irAEs by PD-1 blockade therapy.  
294 Although the significance related to pathogenicity and specificity requires further  
295 validation, our finding provides insights for investigators of thyroid immunity.

296

#### 297 **Data Availability Statement**

298 All datasets presented in this study are included in the article/ supplementary  
299 material.

300

#### 301 **Ethics Statement**

302 The studies involving human participants were reviewed and approved by the  
303 Institutional Review Board and Ethics Committee of the Kyoto University Graduate  
304 School of Medicine. Written informed consent for participation was not required for this  
305 study in accordance with the national legislation and the institutional requirements.

306

#### 307 **Author Contributions**

308 IY designed and conducted experiments. AY, TH, TY, KH, YU, TF, DT, and MS  
309 contributed to the discussion. AY and NI provided funding and supervised the entire study.  
310 IY drafted the manuscript, and all authors reviewed, edited, and approved the manuscript.

311

312 **Funding**

313 This work was supported by JSPS KAKENHI Grant Number 19K23942.

314

315 **Conflict of Interest**

316 The authors declare that the research was conducted in the absence of any  
317 commercial or financial relationships that could be construed as a potential conflict of  
318 interest.

319

320 **Reference**

- 321 1. Barroso-Sousa R, Barry WT, Garrido-Castro AC, Hodi FS, Min L, Krop IE, et al.  
322 Incidence of Endocrine Dysfunction Following the Use of Different Immune  
323 Checkpoint Inhibitor Regimens: A Systematic Review and Meta-analysis. *JAMA*  
324 *Oncol* (2018) 4:173-182. doi: 10.1001/jamaoncol.2017.3064
- 325 2. Yamauchi I, Sakane Y, Fukuda Y, Fujii T, Taura D, Hirata M, et al. Clinical Features of  
326 Nivolumab-Induced Thyroiditis: A Case Series Study. *Thyroid* (2017) 27:894-901. doi:  
327 10.1089/thy.2016.0562
- 328 3. Yamauchi I, Yasoda A, Matsumoto S, Sakamori Y, Kim YH, Nomura M, et al. Incidence,  
329 features, and prognosis of immune-related adverse events involving the thyroid gland  
330 induced by nivolumab. *PLoS One* (2019) 14:e0216954. doi:  
331 10.1371/journal.pone.0216954
- 332 4. de Filette J, Jansen Y, Schreuer M, Everaert H, Velkeniers B, Neyns B, et al. Incidence  
333 of Thyroid-Related Adverse Events in Melanoma Patients Treated With  
334 Pembrolizumab. *J Clin Endocrinol Metab* (2016) 101:4431-4439. doi:  
335 10.1210/jc.2016-2300

- 336 5. Osorio JC, Ni A, Chaft JE, Pollina R, Kasler MK, Stephens D, et al. Antibody-mediated  
337 thyroid dysfunction during T-cell checkpoint blockade in patients with non-small-cell  
338 lung cancer. *Ann Oncol* (2017) 28:583-589. doi: 10.1093/annonc/mdw640
- 339 6. Delivanis DA, Gustafson MP, Bornschlegl S, Merten MM, Kottschade L, Withers S, et  
340 al. Pembrolizumab-Induced Thyroiditis: Comprehensive Clinical Review and Insights  
341 Into Underlying Involved Mechanisms. *J Clin Endocrinol Metab* (2017) 102:2770-  
342 2780. doi: 10.1210/jc.2017-00448
- 343 7. Bastman JJ, Serracino HS, Zhu Y, Koenig MR, Mateescu V, Sams SB, et al. Tumor-  
344 Infiltrating T Cells and the PD-1 Checkpoint Pathway in Advanced Differentiated and  
345 Anaplastic Thyroid Cancer. *J Clin Endocrinol Metab* (2016) 101:2863-2873. doi:  
346 10.1210/jc.2015-4227
- 347 8. Chintakuntlawar AV, Rumilla KM, Smith CY, Jenkins SM, Foote RL, Kasperbauer JL,  
348 et al. Expression of PD-1 and PD-L1 in Anaplastic Thyroid Cancer Patients Treated  
349 With Multimodal Therapy: Results From a Retrospective Study. *J Clin Endocrinol*  
350 *Metab* (2017) 102:1943-1950. doi: 10.1210/jc.2016-3756
- 351 9. Hayashi M, Kouki T, Takasu N, Sunagawa S, and Komiya I. Association of an A/C  
352 single nucleotide polymorphism in programmed cell death-ligand 1 gene with Graves'  
353 disease in Japanese patients. *Eur J Endocrinol* (2008) 158:817-822. doi: 10.1530/eje-  
354 07-0649
- 355 10. Newby PR, Roberts-Davies EL, Brand OJ, Heward JM, Franklyn JA, Gough SC, et  
356 al. Tag SNP screening of the PDCD1 gene for association with Graves' disease. *Clin*  
357 *Endocrinol (Oxf)* (2007) 67:125-128. doi: 10.1111/j.1365-2265.2007.02848.x
- 358 11. Burch HB. Drug Effects on the Thyroid. *N Engl J Med* (2019) 381:749-761. doi:  
359 10.1056/NEJMra1901214



- 360 12. Kim HI, Kim M, Lee SH, Park SY, Kim YN, Kim H, et al. Development of thyroid  
361 dysfunction is associated with clinical response to PD-1 blockade treatment in patients  
362 with advanced non-small cell lung cancer. *Oncoimmunology* (2017) 7:e1375642. doi:  
363 10.1080/2162402x.2017.1375642
- 364 13. Freeman-Keller M, Kim Y, Cronin H, Richards A, Gibney G, and Weber JS.  
365 Nivolumab in Resected and Unresectable Metastatic Melanoma: Characteristics of  
366 Immune-Related Adverse Events and Association with Outcomes. *Clin Cancer Res*  
367 (2016) 22:886-894. doi: 10.1158/1078-0432.ccr-15-1136
- 368 14. Fujimoto D, Yoshioka H, Kataoka Y, Morimoto T, Kim YH, Tomii K, et al. Efficacy  
369 and safety of nivolumab in previously treated patients with non-small cell lung cancer:  
370 A multicenter retrospective cohort study. *Lung Cancer* (2018) 119:14-20. doi:  
371 10.1016/j.lungcan.2018.02.017
- 372 15. Mazarico I, Capel I, Gimenez-Palop O, Albert L, Berges I, Luchtenberg F, et al. Low  
373 frequency of positive antithyroid antibodies is observed in patients with thyroid  
374 dysfunction related to immune check point inhibitors. *J Endocrinol Invest* (2019)  
375 42:1443-1450. doi: 10.1007/s40618-019-01058-x
- 376 16. Yano S, Ashida K, Nagata H, Ohe K, Wada N, Takeichi Y, et al. Nivolumab-induced  
377 thyroid dysfunction lacking antithyroid antibody is frequently evoked in Japanese  
378 patients with malignant melanoma. *BMC Endocr Disord* (2018) 18:36. doi:  
379 10.1186/s12902-018-0267-x
- 380 17. Yamamoto M, Iguchi G, Takeno R, Okimura Y, Sano T, Takahashi M, et al. Adult  
381 combined GH, prolactin, and TSH deficiency associated with circulating PIT-1  
382 antibody in humans. *J Clin Invest* (2011) 121:113-119. doi: 10.1172/jci44073
- 383 18. Santisteban P, and Bernal J. Thyroid development and effect on the nervous system.

- 384 *Rev Endocr Metab Disord* (2005) 6:217-228. doi: 10.1007/s11154-005-3053-9
- 385 19. Yamauchi I, Sakane Y, Yamashita T, Hirota K, Ueda Y, Kanai Y, et al. Effects of  
386 growth hormone on thyroid function are mediated by type 2 iodothyronine deiodinase  
387 in humans. *Endocrine* (2018) 59:353-363. doi: 10.1007/s12020-017-1495-y
- 388 20. Ladenson PW. "Diagnosis of hypothyroidism." In: Braverman LE, Cooper D, editor.  
389 Werner & Ingbar's The Thyroid: A Fundamental and Clinical Text (10th). Philadelphia,  
390 PA: Lippincott Williams & Wilkins (2013). p. 606-611.
- 391 21. Kimbara S, Fujiwara Y, Iwama S, Ohashi K, Kuchiba A, Arima H, et al. Association  
392 of antithyroglobulin antibodies with the development of thyroid dysfunction induced  
393 by nivolumab. *Cancer Sci* (2018) 109:3583-3590. doi: 10.1111/cas.13800
- 394 22. Hoshino K, Muro Y, Sugiura K, Tomita Y, Nakashima R, and Mimori T. Anti-MDA5  
395 and anti-TIF1-gamma antibodies have clinical significance for patients with  
396 dermatomyositis. *Rheumatology (Oxford)* (2010) 49:1726-1733. doi:  
397 10.1093/rheumatology/keq153
- 398 23. Honnorat J, and Antoine JC. Paraneoplastic neurological syndromes. *Orphanet J Rare*  
399 *Dis* (2007) 2:22. doi: 10.1186/1750-1172-2-22
- 400 24. Tanaka K, Tanaka M, Onodera O, Igarashi S, Miyatake T, and Tsuji S. Passive transfer  
401 and active immunization with the recombinant leucine-zipper (Yo) protein as an  
402 attempt to establish an animal model of paraneoplastic cerebellar degeneration. *J*  
403 *Neurol Sci* (1994) 127:153-158. doi: 10.1016/0022-510x(94)90067-1
- 404 25. Tanaka M, Tanaka K, Onodera O, and Tsuji S. Trial to establish an animal model of  
405 paraneoplastic cerebellar degeneration with anti-Yo antibody. 1. Mouse strains bearing  
406 different MHC molecules produce antibodies on immunization with recombinant Yo  
407 protein, but do not cause Purkinje cell loss. *Clin Neurol Neurosurg* (1995) 97:95-100.

- 408       doi: 10.1016/0303-8467(95)00005-5
- 409   26. Sillevis Smitt PA, Manley GT, and Posner JB. Immunization with the paraneoplastic  
410       encephalomyelitis antigen HuD does not cause neurologic disease in mice. *Neurology*  
411       (1995) 45:1873-1878. doi: 10.1212/wnl.45.10.1873
- 412   27. Tanaka M, Maruyama Y, Sugie M, Motizuki H, Kamakura K, and Tanaka K. Cytotoxic  
413       T cell activity against peptides of Hu protein in anti-Hu syndrome. *J Neurol Sci* (2002)  
414       201:9-12. doi: 10.1016/s0022-510x(02)00157-0
- 415   28. Kamphorst AO, Pillai RN, Yang S, Nasti TH, Akondy RS, Wieland A, et al.  
416       Proliferation of PD-1+ CD8 T cells in peripheral blood after PD-1-targeted therapy in  
417       lung cancer patients. *Proc Natl Acad Sci U S A* (2017) 114:4993-4998. doi:  
418       10.1073/pnas.1705327114
- 419   29. Tacha D, Zhou D, and Cheng L. Expression of PAX8 in normal and neoplastic tissues:  
420       a comprehensive immunohistochemical study. *Appl Immunohistochem Mol Morphol*  
421       (2011) 19:293-299. doi: 10.1097/PAI.0b013e3182025f66
- 422   30. Ji GH, Cui Y, Yu H, and Cui XB. Profiling analysis of FOX gene family members  
423       identified FOXE1 as potential regulator of NSCLC development. *Cell Mol Biol*  
424       (*Noisy-le-grand*) (2016) 62:57-62. doi: 10.14715/cmb/ 2016.62.11.10
- 425   31. Bychkov A, Saenko V, Nakashima M, Mitsutake N, Rogounovitch T, Nikitski A, et al.  
426       Patterns of FOXE1 expression in papillary thyroid carcinoma by  
427       immunohistochemistry. *Thyroid* (2013) 23:817-828. doi: 10.1089/thy.2012.0466
- 428   32. Weetman AP. "Chronic autoimmune thyroiditis." In: Braverman LE, Cooper D, editor.  
429       Werner & Ingbar's The Thyroid: A Fundamental and Clinical Text (10th). Philadelphia,  
430       PA: Lippincott Williams & Wilkins (2013). p. 525-535.
- 431   33. Imaizumi M, Pritsker A, Kita M, Ahmad L, Unger P, and Davies T. Pregnancy and

432 murine thyroiditis: thyroglobulin immunization leads to fetal loss in specific  
433 allogeneic pregnancies. *Endocrinology* (2001) 142:823-829. doi:  
434 10.1210/endo.142.2.7966  
435

436 **Figure Legends**

437 Figure 1. Verification of constructed plasmid vectors. Protein lysates of transfected  
438 HEK293T cells were analyzed by western blot. Transfected plasmid vectors are presented  
439 as follows: Empty, pcDNA3.1; NKX2-1, pcDNA3.1-FLAG-NKX2-1-HiBit; PAX8,  
440 pcDNA3.1-FLAG-PAX8-HiBit; FOXE1, pcDNA3.1-FLAG-FOXE1-HiBit; and HHEX,  
441 pcDNA3.1-FLAG-HHEX-HiBit. The left panel shows detection of the FLAG tag  
442 attached to the N-terminus, and the right panel shows detection of the HiBit tag attached  
443 to the C-terminus. Molecular weights (MW) ranged from 20 to 80 kDa.

444

445 Figure 2. Western blot of pellets of immunoprecipitation (IP) using cell lysates  
446 overexpressing proteins of interest and sera of patients. Tagged proteins of NKX2-1,  
447 PAX8, FOXE1, and HHEX were individually overexpressed. A pellet of control A was  
448 obtained using serum of a subject that was confirmed as euthyroid and negative for  
449 TPOAb and TgAb. We electrophoresed 0.5% of input protein as size markers of the  
450 overexpressed protein, and detected human immunoglobulins (Ig) and  $\beta$ -actin as controls  
451 of IP and protein loading, respectively. **(A)** Patient 1 with malignant melanoma.  
452 Compared to the control A, the FOXE1 bands were augmented. **(B)** Patient 2 with non-  
453 small cell lung cancer. The PAX8 band was augmented. **(C)** Patient 3 with renal cell  
454 carcinoma. The PAX8 band, FOXE1 bands, and HHEX band were augmented.

455

456 Figure 3. Western blot of IP pellets using cell lysates overexpressing proteins of interest  
457 and sera of 3 additional control subjects referred to as control B, C, and D. Compared to  
458 the control A identical to that in Figure 2, the PAX8 band, FOXE1 bands, and HHEX  
459 band were not augmented in any samples.

**Table 1. Characteristics of studied cases with thyroid irAEs**

|                                 | Patient 1          | Patient 2                  | Patient 3            |
|---------------------------------|--------------------|----------------------------|----------------------|
| Age (year)                      | 82                 | 62                         | 59                   |
| Sex                             | Female             | Female                     | Female               |
| Malignancy                      | Malignant melanoma | Non-small cell lung cancer | Renal cell carcinoma |
| Data at baseline                |                    |                            |                      |
| TSH ( $\mu$ IU/mL)              | 4.810              | 1.790                      | 5.380                |
| fT4 (ng/dL)                     | 1.350              | 1.200                      | 1.200                |
| fT3 (pg/mL)                     | 2.09               | 2.97                       | 2.54                 |
| Thyroid uptake at FDG-PET       | Positive           | Negative                   | NA                   |
| Data at onset of thyrotoxicosis |                    |                            |                      |
| Date (day)                      | ND                 | 42                         | 41                   |
| TSH ( $\mu$ IU/mL)              | ND                 | 0.266                      | 0.107                |
| fT4 (ng/dL)                     | ND                 | 1.710                      | 2.010                |
| fT3 (pg/mL)                     | ND                 | 4.00                       | 5.02                 |
| Data at onset of hypothyroidism |                    |                            |                      |
| Date (day)                      | 53                 | 124                        | ND                   |
| TSH ( $\mu$ IU/mL)              | 125.900            | 139.900                    | ND                   |
| fT4 (ng/dL)                     | 0.460              | 0.230                      | ND                   |
| fT3 (pg/mL)                     | 1.04               | 1.07                       | ND                   |
| Data at serum collected         |                    |                            |                      |
| Date (day)                      | 123                | 124                        | 129                  |
| TSH ( $\mu$ IU/mL)              | 2.470              | 139.900                    | 1.190                |
| fT4 (ng/dL)                     | 1.700              | 0.230                      | 1.290                |
| fT3 (pg/mL)                     | 2.34               | 1.07                       | 3.43                 |
| Levothyroxine doses             | 100                | 0                          | 0                    |
| Thyroid uptake at FDG-PET       | NA                 | Positive                   | NA                   |
| Detected antibody               |                    |                            |                      |
| TPOAb (IU/mL)                   | 451.9              | Negative                   | 180.3                |
| TgAb (IU/mL)                    | 538.9              | 305.5                      | 1474.0               |
| NKX2-1                          | —                  | —                          | —                    |
| PAX8                            | —                  | +                          | +                    |
| FOXE1                           | +                  | —                          | +                    |

HHEX

—

—

+

---

irAE: immune-related adverse event

ND: not developed, NA: not available

TPOAb: anti-thyroid peroxidase antibody, TgAb: anti-thyroglobulin antibody

Dates are presented as days after the first administration of nivolumab.

Reference range: TSH, 0.500–5.000  $\mu$ IU/mL; fT4, 0.880–1.620 ng/dL; fT3, 2.33–4.00 pg/mL; TPOAb, < 16.0 IU/mL; and TgAb, < 28.0 IU/mL.

460

461 **Figure 1**

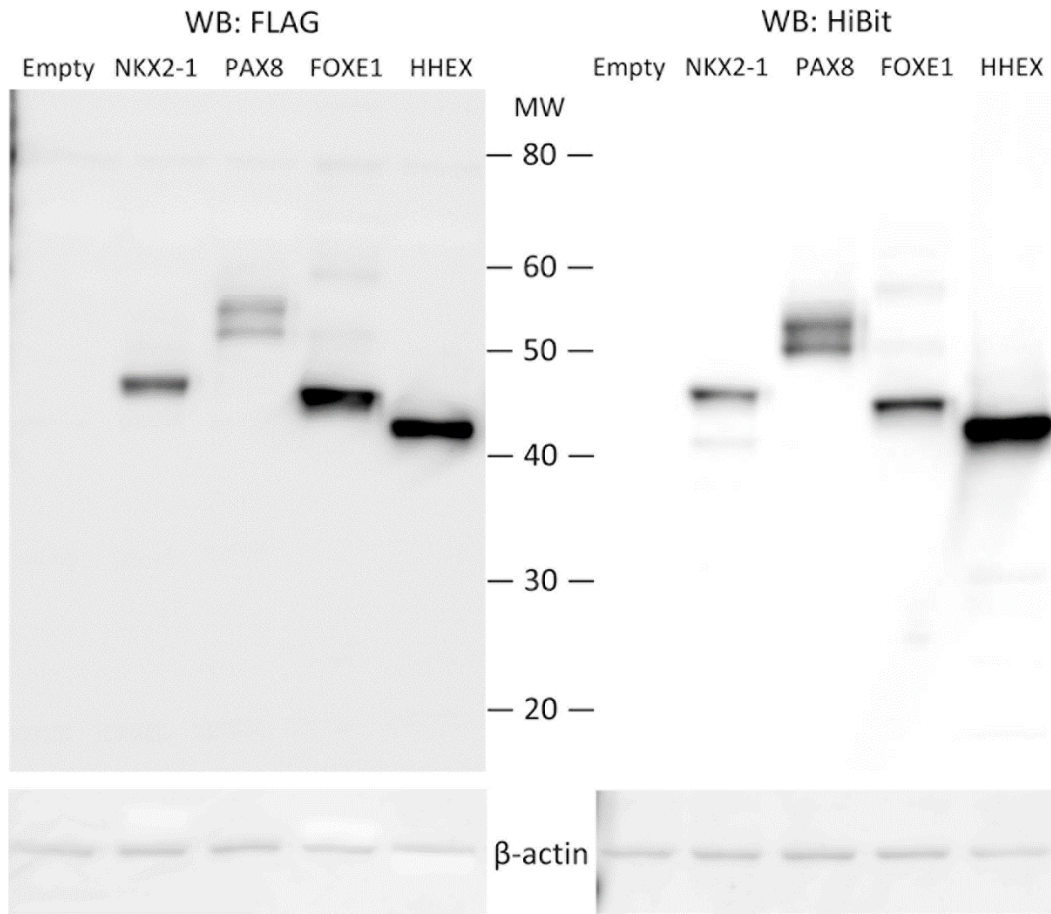

462



463 **Figure 2**

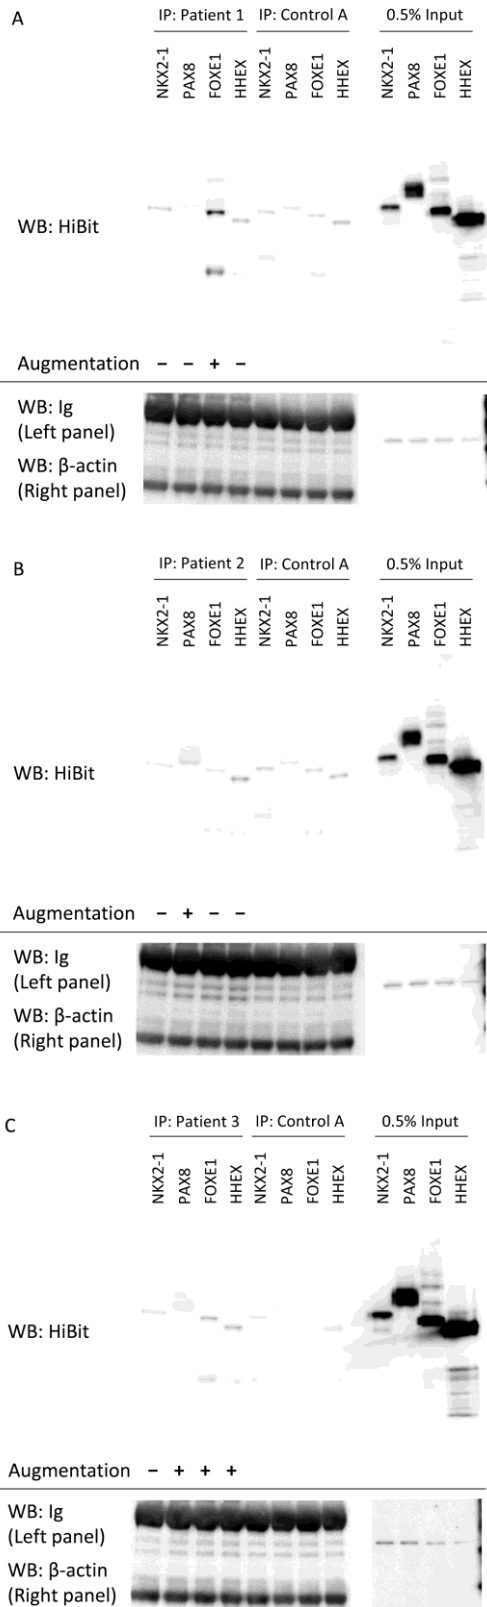

464

465 **Figure 3**

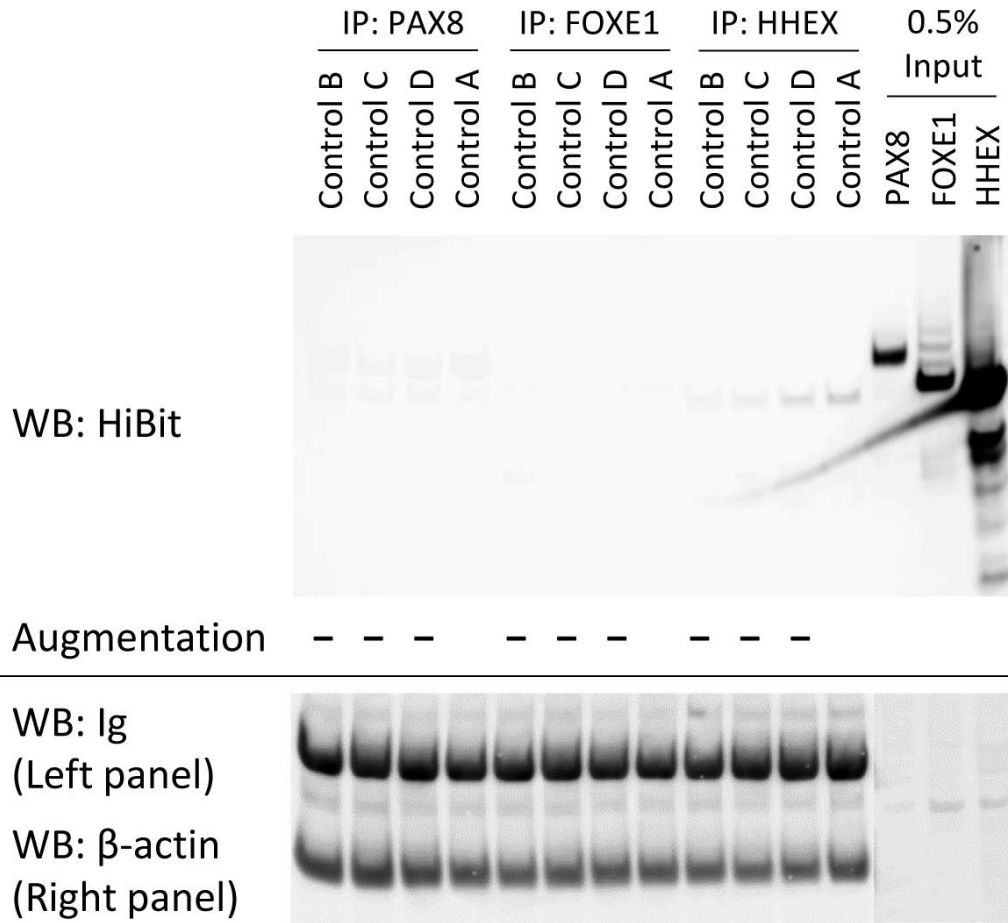

466
